# Supplementary material
Source: PubMed Central journal article supplement (PMC6368222)
Supplement: NIHMS1005933-supplement-supp-tables.pdf [file NIHMS1005933-supplement-supp-tables.pdf]

**Supplemental Table 1.** Association between long-term and recent weight change and HR-pQCT indices at the tibia and radius, adjusted for age, sex, height, current smoking, diabetes and initial weight (i.e. initial weight = weight at enrollment for long-term weight change; and initial weight = weight at preceding clinic visit for recent weight change). Beta coefficients are presented for weight change treated as a continuous variable, and least square means are presented for weight change group.

|                                        | Weight Change <sup>a</sup> |                      |                     |                          |                     |                      |                      |                      |                     |                          |                     |                      |
|----------------------------------------|----------------------------|----------------------|---------------------|--------------------------|---------------------|----------------------|----------------------|----------------------|---------------------|--------------------------|---------------------|----------------------|
|                                        | Long-term weight change    |                      |                     |                          |                     |                      | Recent weight change |                      |                     |                          |                     |                      |
|                                        | Continuous                 |                      | Categorical Measure |                          |                     |                      | Continuous           |                      | Categorical Measure |                          |                     |                      |
|                                        | Beta                       | P-value <sup>b</sup> | ≥5% loss<br>(N=166) | <5%<br>change<br>(N=275) | ≥5% gain<br>(N=920) | P-value <sup>b</sup> | Beta                 | P-value <sup>b</sup> | ≥5% loss<br>(N=301) | <5%<br>change<br>(N=834) | ≥5% gain<br>(N=226) | P-value <sup>b</sup> |
| <b>HR-pQCT indices<sup>c</sup></b>     |                            |                      |                     |                          |                     |                      |                      |                      |                     |                          |                     |                      |
| <b>Tibia<br/>(N=1328)<sup>d</sup></b>  |                            |                      | Mean <sup>e</sup>   |                          |                     |                      |                      | Mean <sup>e</sup>    |                     |                          |                     |                      |
| Ct.BMD                                 | 0.7246                     | <.0001               | 832.2               | 838.6                    | 858.2               | <.0001               | 1.2199               | <.0001               | 836.8               | 852.8                    | 858.5               | 0.0005               |
| Ct.Po                                  | -0.0115                    | 0.0356               | 10.312              | 10.629                   | 10.086              | 0.4490               | -0.0365              | 0.0046               | 10.666              | 10.251                   | 9.936               | 0.0143               |
| Ct.Th                                  | 0.0033                     | <.0001               | 1.100               | 1.158                    | 1.228               | <.0001               | 0.0042               | <.0001               | 1.159               | 1.201                    | 1.232               | 0.0009               |
| Tb.BMD                                 | 0.2920                     | <.0001               | 162.0               | 171.1                    | 174.9               | <.0001               | 0.2151               | 0.1297               | 170.4               | 173.6                    | 175.0               | 0.1562               |
| Tb.N                                   | 0.0060                     | <.0001               | 1.880               | 1.980                    | 2.088               | <.0001               | 0.0074               | <.0001               | 1.978               | 2.054                    | 2.119               | <.0001               |
| Tb.Th                                  | -0.0001                    | 0.0009               | 0.072               | 0.072                    | 0.070               | 0.1036               | -0.0001              | 0.0039               | 0.072               | 0.071                    | 0.069               | 0.0121               |
| Tt.Ar                                  | 0.1562                     | 0.3160               | 776.5               | 770.1                    | 769.6               | 0.4229               | -0.0487              | 0.8965               | 775.8               | 777.2                    | 768.3               | 0.3833               |
| Tt.BMD                                 | 0.7033                     | <.0001               | 259.8               | 275.3                    | 288.2               | <.0001               | 0.8319               | <.0001               | 273.3               | 283.1                    | 289.5               | 0.0005               |
| FL                                     | 12.5653                    | <.0001               | 5980                | 6274                     | 6496                | <.0001               | 14.6088              | 0.0001               | 6267                | 6467                     | 6478                | 0.0159               |
| <b>Radius<br/>(N=1263)<sup>d</sup></b> |                            |                      |                     |                          |                     |                      |                      |                      |                     |                          |                     |                      |
| Ct.BMD                                 | 0.2150                     | 0.0506               | 943.4               | 944.9                    | 946.0               | 0.6808               | 0.4581               | 0.0798               | 941.3               | 946.1                    | 946.0               | 0.4410               |
| Ct.Po                                  | -0.0004                    | 0.8773               | 3.894               | 4.078                    | 4.001               | 0.5066               | -0.0009              | 0.8891               | 4.011               | 4.050                    | 3.983               | 0.8556               |
| Ct.Th                                  | 0.0019                     | <.0001               | 0.819               | 0.844                    | 0.882               | 0.0005               | 0.0031               | <.0001               | 0.835               | 0.873                    | 0.891               | 0.0016               |
| Tb.BMD                                 | 0.3292                     | <.0001               | 154.8               | 159.0                    | 166.3               | 0.0015               | 0.4309               | 0.0040               | 159.9               | 163.2                    | 168.7               | 0.0113               |
| Tb.N                                   | 0.0041                     | <.0001               | 1.948               | 1.991                    | 2.109               | <.0001               | 0.0046               | 0.0007               | 2.011               | 2.080                    | 2.095               | 0.0075               |
| Tb.Th                                  | 0.0000                     | 0.7852               | 0.066               | 0.066                    | 0.066               | 0.6826               | 0.0000               | 0.9939               | 0.066               | 0.065                    | 0.066               | 0.7935               |
| Tt.Ar                                  | 0.0214                     | 0.7826               | 307.4               | 312.1                    | 312.2               | 0.2757               | 0.0317               | 0.8647               | 314.0               | 313.0                    | 310.3               | 0.3903               |
| Tt.BMD                                 | 0.6626                     | <.0001               | 294.3               | 301.9                    | 315.1               | 0.0005               | 0.9162               | 0.0002               | 300.8               | 310.3                    | 319.0               | 0.0016               |
| FL                                     | 3.5057                     | <.0001               | 2407                | 2512                     | 2572                | 0.0002               | 5.0189               | 0.0065               | 2492                | 2560                     | 2584                | 0.0298               |

<sup>a</sup> Long-term (40 year) weight change was determined between the index examination (2011-2014) and enrollment (1971-1974) and expressed as a percentage of the weight at the

<sup>b</sup> Bold indicates p-values <0.05

<sup>c</sup> Ct.BMD=cortical volumetric bone mineral density, Ct.Po=cortical porosity, Ct.Th=cortical thickness, Tb.BMD=trabecular volumetric bone mineral density, Tb.N=trabecular

<sup>d</sup> The sample includes 1,361 individuals with HR-pQCT measures at the tibia (N=1,328) and/or radius (N=1,263).

<sup>e</sup> Adjusted for age, sex, height, current smoking, and diabetes and initial weight

**Supplemental Table 2.** Association between long-term and recent weight change and HR-pQCT indices at the tibia and radius, adjusted for age, sex, height, current smoking, diabetes. Similar to the analysis shown in Table 3 but **here the covariates information were based on initial/baseline examination** (i.e. baseline = time at enrollment for long-term weight change; and baseline = time at preceding clinic visit for recent weight change). Beta coefficients are presented for weight change treated as a continuous variable, and least square means are presented for weight change group.

|                                        | <u>Weight Change<sup>a</sup></u> |                      |                            |                          |                     |                      |                             |                      |                            |                          |                     |                      |
|----------------------------------------|----------------------------------|----------------------|----------------------------|--------------------------|---------------------|----------------------|-----------------------------|----------------------|----------------------------|--------------------------|---------------------|----------------------|
|                                        | <u>Long-term weight change</u>   |                      |                            |                          |                     |                      | <u>Recent weight change</u> |                      |                            |                          |                     |                      |
|                                        | <u>Continuous</u>                |                      | <u>Catogorical Measure</u> |                          |                     |                      | <u>Continuous</u>           |                      | <u>Catogorical Measure</u> |                          |                     |                      |
| HR--pQCT indices <sup>c</sup>          | Beta                             | P-value <sup>b</sup> | ≥5% loss<br>(N=166)        | <5%<br>change<br>(N=275) | ≥5% gain<br>(N=920) | P-value <sup>b</sup> | Beta                        | P-value <sup>b</sup> | ≥5% loss<br>(N=301)        | <5%<br>change<br>(N=834) | ≥5% gain<br>(N=226) | P-value <sup>b</sup> |
| <u>Tibia</u><br>(N=1328) <sup>d</sup>  |                                  |                      | Mean <sup>e</sup>          |                          |                     |                      |                             |                      | Mean <sup>e</sup>          |                          |                     |                      |
| Ct.BMD                                 | 0.7986                           | <b>&lt;.0001</b>     | 780.6                      | 786.7                    | 807.5               | <b>&lt;.0001</b>     | 1.2011                      | <b>&lt;.0001</b>     | 834.3                      | 849.2                    | 854.8               | <b>0.0012</b>        |
| Ct.Po                                  | -0.0146                          | <b>0.0111</b>        | 12.790                     | 13.096                   | 12.495              | 0.3373               | -0.0398                     | <b>0.0023</b>        | 10.855                     | 10.446                   | 10.102              | <b>0.0124</b>        |
| Ct.Th                                  | 0.0035                           | <b>&lt;.0001</b>     | 1.088                      | 1.138                    | 1.210               | <b>&lt;.0001</b>     | 0.0039                      | <b>&lt;.0001</b>     | 1.152                      | 1.189                    | 1.219               | <b>0.0025</b>        |
| Tb.BMD                                 | 0.3441                           | <b>&lt;.0001</b>     | 136.9                      | 147.0                    | 151.8               | <b>&lt;.0001</b>     | 0.2146                      | 0.1356               | 171.4                      | 174.4                    | 176.4               | 0.1285               |
| Tb.N                                   | 0.0063                           | <b>&lt;.0001</b>     | 1.680                      | 1.780                    | 1.896               | <b>&lt;.0001</b>     | 0.0073                      | <b>&lt;.0001</b>     | 2.006                      | 2.081                    | 2.147               | <b>&lt;.0001</b>     |
| Tb.Th                                  | -0.0001                          | <b>0.0070</b>        | 0.069                      | 0.069                    | 0.067               | 0.2535               | -0.0001                     | <b>0.0040</b>        | 0.072                      | 0.070                    | 0.069               | <b>0.0157</b>        |
| Tt.Ar                                  | 0.0361                           | 0.8258               | 753.9                      | 751.1                    | 752.4               | 0.8647               | 0.2316                      | 0.5354               | 773.0                      | 778.2                    | 771.3               | 0.8416               |
| Tt.BMD                                 | 0.7859                           | <b>&lt;.0001</b>     | 230.3                      | 245.6                    | 259.6               | <b>&lt;.0001</b>     | 0.7855                      | <b>0.0001</b>        | 273.4                      | 282.2                    | 288.8               | <b>0.0009</b>        |
| FL                                     | 13.2809                          | <b>&lt;.0001</b>     | 5092                       | 5406                     | 5668                | <b>&lt;.0001</b>     | 15.1860                     | <b>&lt;.0001</b>     | 6244                       | 6441                     | 6473                | <b>0.0098</b>        |
| <u>Radius</u><br>(N=1263) <sup>d</sup> |                                  |                      |                            |                          |                     |                      |                             |                      |                            |                          |                     |                      |
| Ct.BMD                                 | 0.2925                           | <b>0.0111</b>        | 918.3                      | 920.4                    | 922.3               | 0.5291               | 0.4759                      | 0.0720               | 937.8                      | 942.3                    | 942.5               | 0.4401               |
| Ct.Po                                  | -0.0024                          | 0.4210               | 4.350                      | 4.505                    | 4.408               | 0.7244               | -0.0021                     | 0.7642               | 4.080                      | 4.122                    | 4.038               | 0.7895               |
| Ct.Th                                  | 0.0020                           | <b>&lt;.0001</b>     | 0.721                      | 0.743                    | 0.779               | <b>0.0021</b>        | 0.0031                      | <b>&lt;.0001</b>     | 0.833                      | 0.870                    | 0.887               | <b>0.0023</b>        |
| Tb.BMD                                 | 0.3299                           | <b>&lt;.0001</b>     | 135.3                      | 138.8                    | 146.1               | <b>0.0035</b>        | 0.4019                      | <b>0.0081</b>        | 161.0                      | 163.9                    | 169.4               | <b>0.0163</b>        |
| Tb.N                                   | 0.0044                           | <b>&lt;.0001</b>     | 1.649                      | 1.689                    | 1.810               | <b>&lt;.0001</b>     | 0.0043                      | <b>0.0021</b>        | 2.031                      | 2.099                    | 2.110               | <b>0.0138</b>        |
| Tb.Th                                  | 0.0000                           | 0.4812               | 0.069                      | 0.069                    | 0.069               | 0.5455               | 0.0000                      | 0.9591               | 0.066                      | 0.065                    | 0.066               | 0.7703               |
| Tt.Ar                                  | -0.0047                          | 0.9537               | 332.3                      | 338.7                    | 340.3               | 0.0783               | 0.0854                      | 0.6496               | 311.7                      | 311.0                    | 309.2               | 0.5544               |
| Tt.BMD                                 | 0.6858                           | <b>&lt;.0001</b>     | 257.1                      | 262.8                    | 275.5               | <b>0.0026</b>        | 0.8693                      | <b>0.0006</b>        | 301.6                      | 310.8                    | 318.9               | <b>0.0030</b>        |
| FL                                     | 3.3483                           | <b>&lt;.0001</b>     | 2112                       | 2217                     | 2289                | <b>&lt;.0001</b>     | 5.1057                      | <b>0.0063</b>        | 2491                       | 2556                     | 2585                | <b>0.0279</b>        |

<sup>a</sup> Long-term (40 year) weight change was determined between the index examination (2011-2014) and enrollment (1971-1974) and expressed as a percentage of the weight at the

<sup>b</sup> Bold indicates p-values <0.05

<sup>c</sup> Ct.BMD=cortical volumetric bone mineral density, Ct.Po=cortical porosity, Ct.Th=cortical thickness, Tb.BMD=trabecular volumetric bone mineral density, Tb.N=trabecular

<sup>d</sup> The sample includes 1,361 individuals with HR-pQCT measures at the tibia (N=1,328) and/or radius (N=1,263).

<sup>e</sup> Adjusted for age, sex, height, current smoking, and diabetes, **assessed at initial/baseline examination**

**Supplemental Table 3.** Association between long-term weight change and HR-pQCT indices at the tibia and radius, adjusted for age, sex, height, current smoking, diabetes and the standard deviation of weight measurements over time. Beta coefficients are presented for weight change treated as a continuous variable, and least square means are presented for weight change group.

| HR--pQCT indices <sup>c</sup>                       | Long-term weight change <sup>a</sup> |                      |                            |                          |                     |                      |
|-----------------------------------------------------|--------------------------------------|----------------------|----------------------------|--------------------------|---------------------|----------------------|
|                                                     | <u>Continuous</u>                    |                      | <u>Catogorical Measure</u> |                          |                     |                      |
|                                                     | Beta                                 | P-value <sup>b</sup> | ≥5% loss<br>(N=166)        | <5%<br>change<br>(N=275) | ≥5% gain<br>(N=920) | P-value <sup>b</sup> |
| <b><u>Tibia</u></b><br><b>(N=1328)<sup>d</sup></b>  |                                      |                      | <b>Mean<sup>e</sup></b>    |                          |                     |                      |
| <b>Ct.BMD</b>                                       | 0.9493                               | <b>&lt;.0001</b>     | 833.3                      | 839.1                    | 858.2               | <b>&lt;.0001</b>     |
| <b>Ct.Po</b>                                        | -0.0277                              | <b>&lt;.0001</b>     | 10.577                     | 10.820                   | 10.046              | 0.0681               |
| <b>Ct.Th</b>                                        | 0.0033                               | <b>&lt;.0001</b>     | 1.126                      | 1.176                    | 1.225               | <b>&lt;.0001</b>     |
| <b>Tb.BMD</b>                                       | 0.1136                               | 0.1289               | 168.2                      | 175.3                    | 174.0               | 0.0750               |
| <b>Tb.N</b>                                         | 0.0019                               | <b>0.0079</b>        | 1.979                      | 2.066                    | 2.065               | <b>0.0056</b>        |
| <b>Tb.Th</b>                                        | 0.0000                               | 0.5915               | 0.071                      | 0.071                    | 0.071               | 0.4780               |
| <b>Tt.Ar</b>                                        | -1.2403                              | <b>&lt;.0001</b>     | 801.3                      | 789.3                    | 764.7               | <b>&lt;.0001</b>     |
| <b>Tt.BMD</b>                                       | 0.6415                               | <b>&lt;.0001</b>     | 266.6                      | 280.0                    | 287.2               | <b>&lt;.0001</b>     |
| <b>FL</b>                                           | 4.5794                               | <b>0.0264</b>        | 6260                       | 6464                     | 6460                | <b>0.0260</b>        |
| <b><u>Radius</u></b><br><b>(N=1263)<sup>d</sup></b> |                                      |                      |                            |                          |                     |                      |
| <b>Ct.BMD</b>                                       | 0.5197                               | <b>0.0001</b>        | 940.8                      | 942.4                    | 946.8               | 0.3321               |
| <b>Ct.Po</b>                                        | -0.0065                              | 0.0709               | 4.018                      | 4.167                    | 3.979               | 0.8095               |
| <b>Ct.Th</b>                                        | 0.0017                               | <b>&lt;.0001</b>     | 0.836                      | 0.859                    | 0.878               | <b>0.0202</b>        |
| <b>Tb.BMD</b>                                       | 0.2126                               | <b>0.0068</b>        | 158.4                      | 162.3                    | 165.3               | 0.0503               |
| <b>Tb.N</b>                                         | 0.0027                               | <b>0.0002</b>        | 1.986                      | 2.029                    | 2.097               | <b>0.0007</b>        |
| <b>Tb.Th</b>                                        | 0.0000                               | 0.6751               | 0.066                      | 0.066                    | 0.066               | 0.5447               |
| <b>Tt.Ar</b>                                        | -0.2103                              | <b>0.0306</b>        | 313.7                      | 315.9                    | 311.6               | 0.6344               |
| <b>Tt.BMD</b>                                       | 0.5664                               | <b>&lt;.0001</b>     | 299.0                      | 306.7                    | 313.5               | <b>0.0133</b>        |
| <b>FL</b>                                           | 1.5427                               | 0.1224               | 2481                       | 2564                     | 2559                | 0.0770               |

<sup>a</sup> Long-term (40 year) weight change was determined between the index examination (2011-2014) and enrollment (1971-1974) and expressed as a percentage of the weight at the index examination. Recent (6 year) weight change was determined between the index examination and the preceding clinic visit (2005-2008) and expressed as a percentage of the weight at the preceding clinic visit.

<sup>b</sup> Bold indicates p-values <0.05

<sup>c</sup> Ct.BMD=cortical volumetric bone mineral density, Ct.Po=cortical porosity, Ct.Th=cortical thickness, Tb.BMD=trabecular volumetric bone mineral density, Tb.N=trabecular number, Tt.BMD= total (integral) volumetric bone mineral density, Tt.CSA=total cross-sectional area (Tt.CSA, mm<sup>2</sup>), FEA=Micro finite element analysis, and FL=failure load

<sup>d</sup> The sample includes 1,361 individuals with HR-pQCT measures at the tibia (N=1,328) and/or radius (N=1,263).

<sup>e</sup> Adjusted for age, sex, height, current smoking, and diabetes and **the standard deviation of weight measurements over time**

**Supplemental Table 4.** Association between long-term and recent weight change and HR-pQCT indices at the tibia and radius in men, adjusted for age, sex, height, current smoking, and diabetes. Beta coefficients are presented for weight change treated as a continuous variable, and least square means are presented for weight change group

| <b>Weight Change<sup>a</sup></b>      |                         |                      |                     |                    |                  |                      |                      |                      |                     |                    |                 |                      |
|---------------------------------------|-------------------------|----------------------|---------------------|--------------------|------------------|----------------------|----------------------|----------------------|---------------------|--------------------|-----------------|----------------------|
| HR-pQCT indices <sup>c</sup>          | Long-term weight change |                      |                     |                    |                  |                      | Recent weight change |                      |                     |                    |                 |                      |
|                                       | Continuous              |                      | Categorical Measure |                    |                  |                      | Continuous           |                      | Categorical Measure |                    |                 |                      |
|                                       | Beta                    | P-value <sup>b</sup> | ≥5% loss (N=89)     | <5% change (N=149) | ≥5% gain (N=356) | P-value <sup>b</sup> | Beta                 | P-value <sup>b</sup> | ≥5% loss (N=122)    | <5% change (N=389) | ≥5% gain (N=83) | P-value <sup>b</sup> |
| <u>Tibia</u><br>(N=580) <sup>d</sup>  |                         |                      | Mean <sup>e</sup>   |                    |                  |                      |                      |                      | Mean <sup>e</sup>   |                    |                 |                      |
| Ct.BMD                                | 0.3765                  | 0.0729               | 854.6               | 865.4              | 875.4            | <b>0.014</b>         | 0.8285               | 0.0670               | 857.9               | 873.7              | 870.8           | 0.186                |
| Ct.Po                                 | -0.0100                 | 0.3145               | 10.491              | 10.693             | 9.990            | 0.212                | -0.0202              | 0.3478               | 10.450              | 10.127             | 10.264          | 0.692                |
| Ct.Th                                 | 0.0019                  | <b>0.0177</b>        | 1.262               | 1.356              | 1.358            | <b>0.003</b>         | 0.0037               | <b>0.0324</b>        | 1.308               | 1.344              | 1.367           | 0.115                |
| Tb.BMD                                | -0.1497                 | 0.1815               | 186.9               | 189.9              | 186.5            | 0.916                | -0.3206              | 0.1841               | 190.1               | 186.2              | 186.9           | 0.535                |
| Tb.N                                  | 0.0022                  | <b>0.0306</b>        | 2.176               | 2.235              | 2.240            | 0.118                | 0.0013               | 0.5390               | 2.226               | 2.210              | 2.283           | 0.231                |
| Tb.Th                                 | -0.0001                 | <b>0.0008</b>        | 0.072               | 0.071              | 0.070            | 0.092                | -0.0002              | <b>0.0363</b>        | 0.072               | 0.071              | 0.068           | 0.052                |
| Tt.Ar                                 | -0.9320                 | <b>0.0071</b>        | 929.5               | 908.1              | 887.2            | <b>0.002</b>         | -1.4386              | 0.0544               | 912.5               | 902.8              | 872.9           | <b>0.014</b>         |
| Tt.BMD                                | 0.1915                  | 0.2369               | 291.5               | 305.1              | 306.1            | <b>0.025</b>         | 0.2073               | 0.5525               | 300.6               | 302.8              | 307.3           | 0.375                |
| FL                                    | -6.6814                 | 0.0678               | 7779                | 7914               | 7774             | 0.971                | -5.3583              | 0.4961               | 7810                | 7849               | 7654            | 0.364                |
| <u>Radius</u><br>(N=546) <sup>d</sup> |                         |                      |                     |                    |                  |                      |                      |                      |                     |                    |                 |                      |
| Ct.BMD                                | 0.0457                  | 0.8030               | 942.5               | 938.6              | 946.1            | 0.635                | -0.0861              | 0.8253               | 941.3               | 948.6              | 934.0           | 0.395                |
| Ct.Po                                 | -0.0041                 | 0.4430               | 4.592               | 4.684              | 4.321            | 0.227                | 0.0062               | 0.5842               | 4.484               | 4.316              | 4.737           | 0.315                |
| Ct.Th                                 | 0.0007                  | 0.2988               | 0.946               | 0.974              | 0.982            | 0.183                | 0.0031               | <b>0.0204</b>        | 0.939               | 0.975              | 1.008           | <b>0.021</b>         |
| Tb.BMD                                | -0.0166                 | 0.8843               | 182.6               | 184.0              | 184.5            | 0.691                | 0.0253               | 0.9168               | 183.9               | 182.3              | 189.1           | 0.330                |
| Tb.N                                  | 0.0003                  | 0.6829               | 2.186               | 2.223              | 2.240            | 0.125                | -0.0010              | 0.5648               | 2.246               | 2.223              | 2.213           | 0.403                |
| Tb.Th                                 | 0.0000                  | 0.3862               | 0.070               | 0.069              | 0.069            | 0.357                | 0.0000               | 0.9245               | 0.069               | 0.069              | 0.071           | 0.149                |
| Tt.Ar                                 | -0.2383                 | 0.1681               | 373.8               | 380.8              | 374.6            | 0.913                | -0.4417              | 0.2301               | 385.9               | 375.0              | 366.6           | <b>0.019</b>         |
| Tt.BMD                                | 0.1332                  | 0.4874               | 326.0               | 330.2              | 334.2            | 0.306                | 0.5440               | 0.1825               | 323.2               | 332.0              | 341.2           | <b>0.047</b>         |
| FL                                    | -1.8066                 | 0.3094               | 3145                | 3251               | 3202             | 0.443                | 0.9008               | 0.8111               | 3166                | 3210               | 3221            | 0.511                |

<sup>a</sup> Long-term (40 year) weight change was determined between the index examination (2011-2014) and enrollment (1971-1974) and expressed as a percentage of the weight at the index examination. Recent (6 year) weight change was determined between the index examination and the preceding clinic visit (2005-2008) and expressed as a percentage of the weight at the preceding clinic visit.

<sup>b</sup> Bold indicates p-values <0.05

<sup>c</sup> Ct.BMD=cortical volumetric bone mineral density, Ct.Po=cortical porosity, Ct.Th=cortical thickness, Tb.BMD=trabecular volumetric bone mineral density, Tb.N=trabecular number, Tt.BMD= total (integral) volumetric bone mineral density, Tt.CSA=total cross-sectional area (Tt.CSA, mm<sup>2</sup>), FEA=Micro finite element analysis, and FL=failure load

<sup>d</sup> The male sample includes individuals with HR-pQCT measures at the tibia (N=580) and/or radius (N=546).

<sup>e</sup> Adjusted for age, sex, height, current smoking, and diabetes

**Supplemental Table 5.** Association between long-term and recent weight change and HR-pQCT indices at the tibia and radius in women, adjusted for age, sex, height, current smoking, and diabetes. Beta coefficients are presented for weight change treated as a continuous variable, and least square means are presented for weight change group

| Weight Change <sup>a</sup>        |                         |                      |                     |                    |                  |                      |                      |                      |                     |                    |                  |                      |
|-----------------------------------|-------------------------|----------------------|---------------------|--------------------|------------------|----------------------|----------------------|----------------------|---------------------|--------------------|------------------|----------------------|
| HR-pQCT indices <sup>c</sup>      | Long-term weight change |                      |                     |                    |                  |                      | Recent weight change |                      |                     |                    |                  |                      |
|                                   | Continuous              |                      | Categorical Measure |                    |                  |                      | Continuous           |                      | Categorical Measure |                    |                  |                      |
|                                   | Beta                    | P-value <sup>b</sup> | ≥5% loss (N=77)     | <5% change (N=126) | ≥5% gain (N=564) | P-value <sup>b</sup> | Beta                 | P-value <sup>b</sup> | ≥5% loss (N=179)    | <5% change (N=445) | ≥5% gain (N=143) | P-value <sup>b</sup> |
| <b>Tibia (N=748)<sup>d</sup></b>  |                         |                      | Mean <sup>e</sup>   |                    |                  |                      |                      | Mean <sup>e</sup>    |                     |                    |                  |                      |
| Ct.BMD                            | 0.7929                  | <.0001               | 809.7               | 809.6              | 838.9            | <b>0.001</b>         | 1.1128               | <b>0.0007</b>        | 818.2               | 830.9              | 838.1            | <b>0.013</b>         |
| Ct.Po                             | -0.0193                 | <b>0.0020</b>        | 10.782              | 10.915             | 10.270           | 0.217                | -0.0501              | <b>0.0014</b>        | 10.996              | 10.472             | 9.830            | <b>0.002</b>         |
| Ct.Th                             | 0.0030                  | <.0001               | 0.979               | 0.967              | 1.087            | <b>0.000</b>         | 0.0023               | <b>0.0377</b>        | 1.028               | 1.050              | 1.061            | 0.220                |
| Tb.BMD                            | 0.2914                  | <.0001               | 150.7               | 158.3              | 164.0            | <b>0.004</b>         | 0.1777               | 0.3147               | 157.9               | 163.2              | 161.6            | 0.381                |
| Tb.N                              | 0.0046                  | <.0001               | 1.800               | 1.834              | 1.959            | <b>0.001</b>         | 0.0050               | <b>0.0060</b>        | 1.853               | 1.936              | 1.939            | 0.050                |
| Tb.Th                             | 0.0000                  | 0.2713               | 0.070               | 0.072              | 0.070            | 0.962                | -0.0001              | 0.2289               | 0.071               | 0.071              | 0.070            | 0.372                |
| Tt.Ar                             | -0.1128                 | 0.4812               | 692.8               | 674.2              | 671.6            | <b>0.046</b>         | -0.2521              | 0.5298               | 676.6               | 675.0              | 670.9            | 0.560                |
| Tt.BMD                            | 0.6909                  | <.0001               | 240.1               | 248.4              | 268.2            | <.0001               | 0.6629               | <b>0.0071</b>        | 252.8               | 263.1              | 264.9            | <b>0.043</b>         |
| FL                                | 11.8677                 | <.0001               | 4856                | 4976               | 5307             | <.0001               | 11.4711              | <b>0.0056</b>        | 5056                | 5231               | 5235             | 0.074                |
| <b>Radius (N=717)<sup>d</sup></b> |                         |                      |                     |                    |                  |                      |                      |                      |                     |                    |                  |                      |
| Ct.BMD                            | 0.3088                  | <b>0.0201</b>        | 937.2               | 947.2              | 945.0            | 0.404                | 0.7634               | <b>0.0246</b>        | 940.2               | 943.9              | 951.8            | 0.155                |
| Ct.Po                             | -0.0030                 | 0.3527               | 3.480               | 3.697              | 3.747            | 0.238                | -0.0094              | 0.2506               | 3.701               | 3.860              | 3.417            | 0.142                |
| Ct.Th                             | 0.0018                  | <.0001               | 0.727               | 0.733              | 0.784            | <b>0.021</b>         | 0.0019               | <b>0.0369</b>        | 0.748               | 0.775              | 0.770            | 0.314                |
| Tb.BMD                            | 0.3538                  | <.0001               | 134.3               | 137.6              | 147.9            | <b>0.009</b>         | 0.4182               | <b>0.0288</b>        | 140.4               | 144.9              | 147.1            | 0.142                |
| Tb.N                              | 0.0043                  | <.0001               | 1.795               | 1.813              | 1.990            | <b>0.000</b>         | 0.0051               | <b>0.0097</b>        | 1.849               | 1.961              | 1.958            | <b>0.021</b>         |
| Tb.Th                             | 0.0000                  | 0.9116               | 0.062               | 0.063              | 0.062            | 0.949                | 0.0000               | 0.8585               | 0.063               | 0.062              | 0.062            | 0.392                |
| Tt.Ar                             | -0.0452                 | 0.5474               | 262.1               | 256.7              | 257.3            | 0.361                | 0.0644               | 0.7372               | 255.4               | 259.2              | 257.5            | 0.652                |
| Tt.BMD                            | 0.6934                  | <.0001               | 269.9               | 276.1              | 293.8            | <b>0.005</b>         | 0.7280               | <b>0.0196</b>        | 281.5               | 288.1              | 292.0            | 0.162                |
| FL                                | 3.3349                  | <.0001               | 1863                | 1886               | 1974             | <b>0.029</b>         | 3.5772               | 0.0533               | 1909                | 1956               | 1952             | 0.330                |

<sup>a</sup> Long-term (40 year) weight change was determined between the index examination (2011-2014) and enrollment (1971-1974) and expressed as a percentage of the weight at the index examination. Recent (6 year) weight change was determined between the index examination and the preceding clinic visit (2005-2008) and expressed as a percentage of the weight at the preceding clinic visit.

<sup>b</sup> Bold indicates p-values <0.05

<sup>c</sup> Ct.BMD=cortical volumetric bone mineral density, Ct.Po=cortical porosity, Ct.Th=cortical thickness, Tb.BMD=trabecular volumetric bone mineral density, Tb.N=trabecular number, Tt.BMD= total (integral) volumetric bone mineral density, Tt.CSA=total cross-sectional area (Tt.CSA, mm<sup>2</sup>), FEA=Micro finite element analysis, and FL=failure load

<sup>d</sup> The female sample includes individuals with HR-pQCT measures at the tibia (N=748) and/or radius (N=717).

<sup>e</sup> Adjusted for age, sex, height, current smoking, and diabetes
